# Supplementary material
Source: PubMed Central journal article supplement (PMC3258869)
Supplement: supp_M804400200_SUPPLEMENTARY_FIGURE_1S.pdf [file supp_M804400200_SUPPLEMENTARY_FIGURE_1S.pdf]

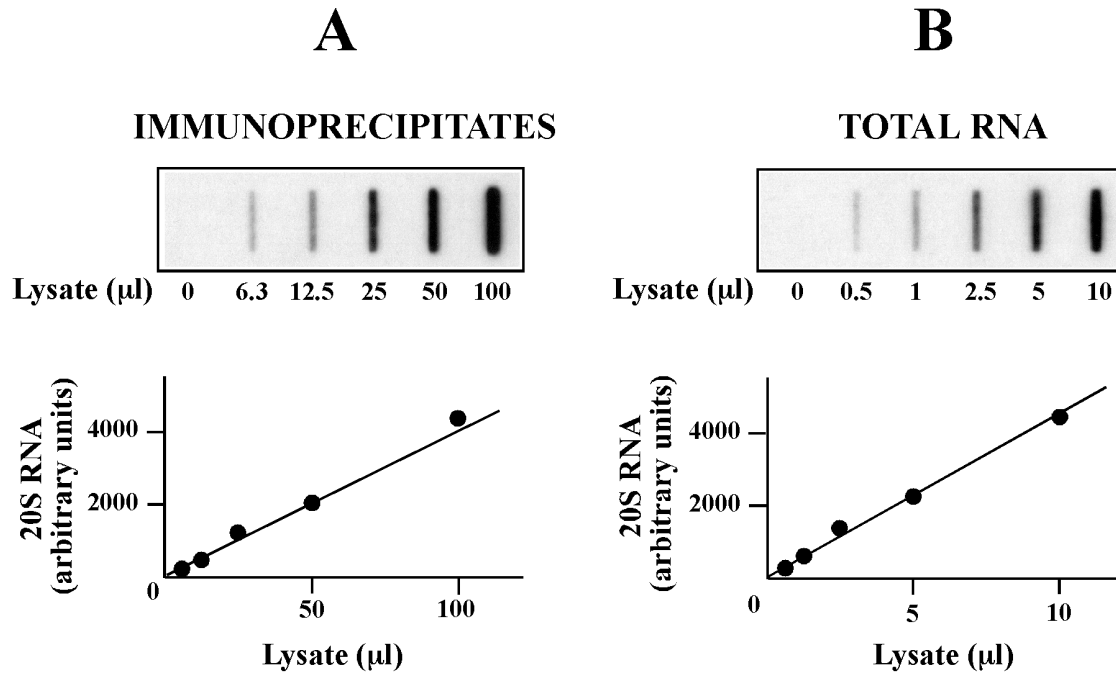

Supplementary Figure1S. Titration of 20S RNA transcripts in complex with p91 (*A*) and in total lysates (*B*). 20S RNA on the membranes was detected by hybridization with a full-size 20S RNA probe and quantified with a Fosforimager.
